# Supplementary material
Source: PubMed Central journal article supplement (PMC3024049)
Supplement: supp_ddq524_ddq524supp.pdf [file supp_ddq524_ddq524supp.pdf]

## SUPPLEMENTARY METHODS

Primer sequences for PCR amplification reactions:

|                    |                                       |
|--------------------|---------------------------------------|
| TCR $\beta$ V5S1a  | TGG TAT CAA CAG ACT CAG GGG           |
| TCR $\beta$ V5S1b  | TTC TCA GTC CAA CAG TTT GAT           |
| TCR $\beta$ V5S1c  | GAC TCT GCC GTG TAC TTC TGT GCC       |
| TCR $\beta$ J2a    | TCT ACT CCA AAC TAC TCC AG            |
| TCR $\beta$ J2b    | CCT CCA AGC GAGG AGA TGT GAA          |
| TCR $\beta$ J2c    | AAA CCG TGA GCC TGG TGC CG            |
| TCR $\gamma$ V3S1a | ACC ATA CAC TGG TAC CGG CA            |
| TCR $\gamma$ V3S1b | ACC CCT ACC CAT ATT TTC TTA G         |
| TCR $\gamma$ V3S1c | ATC TAC TAC TGT TCC TAC GG            |
| TCR $\gamma$ J1/2a | TCA TCA CTG GAA TAA AGC AG            |
| TCR $\gamma$ J1/2b | GGT ACT TAC CGG AGG GAA TT            |
| TCR $\gamma$ J1/2c | TCC TTC TGC AAA TAC CTT GT            |
| p $\kappa$ Ja      | GGA GAG TGC CAG AAT CTG GTT TCA G     |
| p $\kappa$ 6a      | TGC ATG TCA GAG GGC ACA ACT G         |
| p $\kappa$ 6b      | CTA CCA AAC TTT GCA ACA CAC AGG C     |
| p $\kappa$ 6c      | ACA TGT TGC TGT GGT TGT CTG GTG       |
| p $\kappa$ 6d      | GAC CAG CAT GGG CAT CAA GAT GGA GAC   |
| p $\kappa$ g       | GGT ATC AAC AGA AAC CAG GGC AAT CTC C |
| p $\beta$ a        | GCA TTC ATA TCA CAC AGT GAG CAC C     |
| p $\beta$ b        | GGG GTG TAC CAT AAA GGG GAA ATC A     |
| p $\beta$ c        | GCA GTT AGG TTA TCA GAG GAG GGC A     |
| p $\beta$ d        | TGG CCA GGT AGA GTC GGT GG            |
| p $\beta$ e        | TGA GAG CTG TCT CCT ACT ATC GAT       |
| p $\beta$ f        | AGA GTC GGT GGT GCA ACT GAA CCT       |
| p $\beta$ g        | TGA GAA GCA GCT TCT CCG TG            |

## SUPPLEMENTARY FIGURE

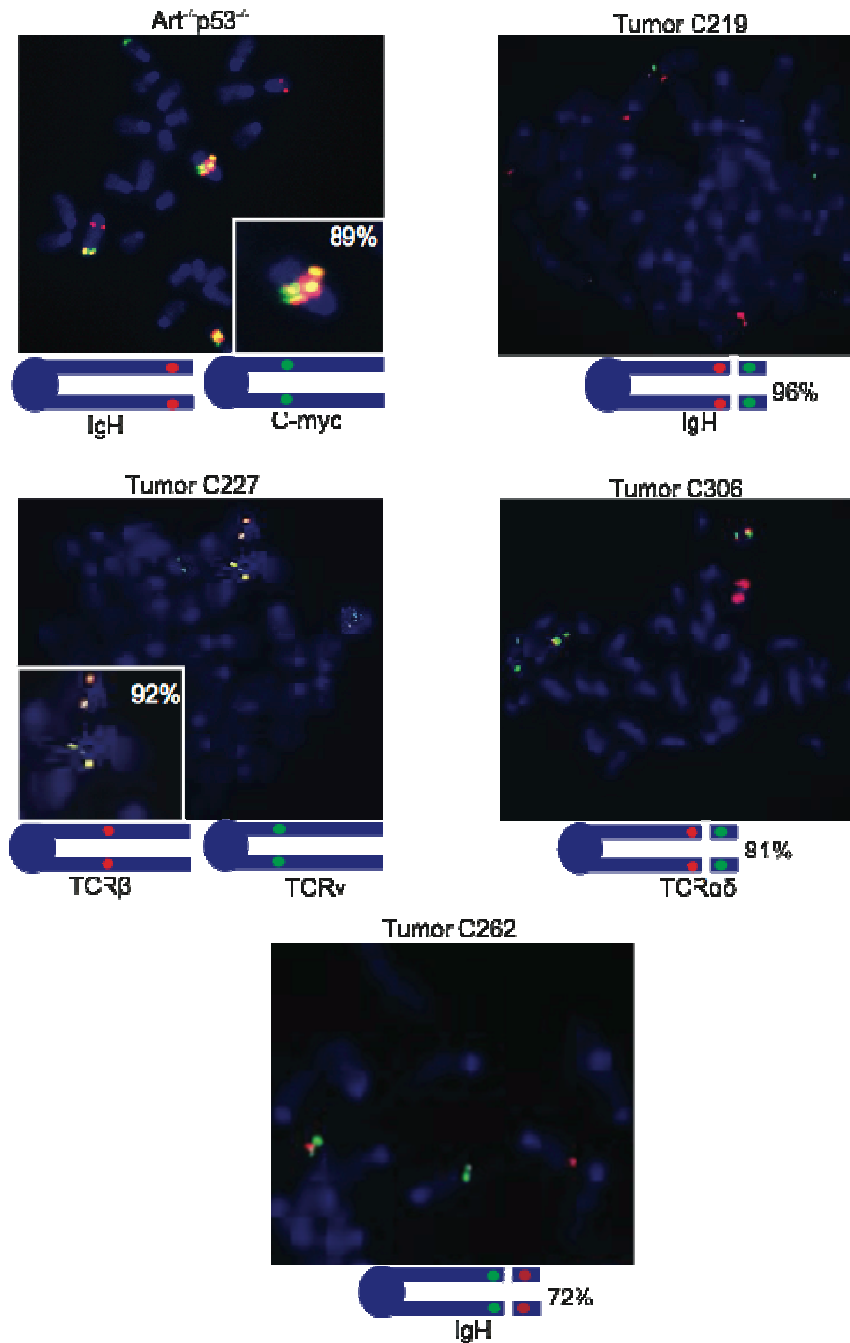

**Supplementary Figure 1. FISH analyses of Art-P70/p53 tumor metaphases.** Chromosomal anomalies in metaphases from primary tumors or early passage cultured tumor cells were analyzed by FISH using the indicated BAC probes. Red and green fluorescent signals, as diagramed. Art<sup>-/-</sup>p53<sup>-/-</sup> (C405), C219, pro-B lymphomas; C227, C306, C262, thymic lymphomas. Representative metaphase images are shown. Percentage of metaphases with the indicated anomalies is indicated. At least 20 metaphases from each tumor were analyzed.
